# Supplementary material for: The golden hour of sepsis: An in-depth analysis of sepsis-related maternal mortality in middle-income country Suriname
Source: PLoS One. 2018 Jul 10;13(7):e0200281. doi: 10.1371/journal.pone.0200281 (PMC6039050; doi:10.1371/journal.pone.0200281)
Supplement: S1 Fig — (XLSX) [file pone.0200281.s002.xlsx]

## Sheet: Sheet1
Temperature in hours after admission
Pulse in hours after admission
Respiratory rate in hours after admission
Bloodpressure in hours after admission
Any vital sign monitored in time per patient
