# Supplementary material for: The golden hour of sepsis: An in-depth analysis of sepsis-related maternal mortality in middle-income country Suriname
Source: PLoS One. 2018 Jul 10;13(7):e0200281. doi: 10.1371/journal.pone.0200281 (PMC6039050; doi:10.1371/journal.pone.0200281)
Supplement: S1 Table — (XLS) [file pone.0200281.s001.xls]

## Sheet: Sheet1
Temperature in hours after admission
Hours	Temp1	Temp2	Temp 3	Temp 4	Temp 5	Temp6	Temp7	Temp8	Temp 9	Temp10	Temp11	Temp12	Temp13	Temp14	Temp15	Temp16	Temp17
0		38.3	38.1	36.4		38.9	38	38.5	39.1	39.7	38.1	37.2	42	38.3	39.5	35.8	38
2													40
4
6										39.1		39.4		37.7
12					39.7								40.3
24				36.5		38.2	38.2	37.3	38.5		40.3			36	40		37.6
36	38.2													36.2			40.4
48	39.2	38.1		37.2		36.7	37.5		40	38				37.7	39
Temp = temperature
Hours = time in hours from admission
Pulse rate in hours after admission
Hours	Pulse1	Pulse2	Pulse3	Pulse4	Pulse5	Pulse6	Pulse7	pulse8	pulse 9	pulse10	pulse11	pulse 12	pulse 13	pulse 14	pulse 15	Pulse 16	pulse 17
0	76	120	120	60		128	106	118	90	120	144	138	115	102	120	100	130
2	112												120
4	130
6	82									80		127		105
12					120
24	110	96		125		140	112	114	120		148			78	120		92
36														100			155
48	168			85		118	128		145	120				96	144
Respiratory rate in hours after admission
Hours	AH1	AH2	AH3	AH4	AH4	AH6	AH7	AH8	AH9	AH10	AH11	AH12	AH13	AH14	AH15	AH16	AH17
0						48	34	24			18	48				40
2													40
4
6						38						22
12
24							40				78						40
36
48						30	33
AH=respiratory rate
Bloodpressure in hours after admission
Hours	sBP1	sBP2	sBP3	sBP4	sBP5	sBP6	sBP7	sBP8	sBP9	sBP10	sBP11	sBP12	sBP13	Sbp14	sBP15	sBP16	sBP17
0	77	130	120	130		90	100	100	89	130	130	95	150	110	140	140	80
2	110												125
4	130
6	118									130		125		140		160
12					0							96
24		130		130		100	88	100	90		140			110	90		80
36														120
48	140			90		120	94		90	130				118	99
sBP=systolic bloodpressure
Any vital sign monitored in time
		Admission	2 hours	4 hours	6 hours	12 hours	24 hours	36 hours	48 hours
Patient 1
	Temperature							38.2	39.2
	Pulse	76	112	130	82		110		168
	Respiratory rate
	Systolic BP	77	110	130	118				140
Patient 2
	Temperature	38.3							38.1
	Pulse	120					96
	Respiratory rate
	Systolic BP	130					130
Patient 3
	Temperature	38.1
	Pulse	120
	Respiratory rate
	Systolic BP	120
Patient 4
	Temperature	36.4					36.5		37.2
	Pulse	60					125		85
	Respiratory rate	130					130		90
	Systolic BP
Patient 5
	Temperature					39.7
	Pulse					120
	Respiratory rate
	Systolic BP
Patient 6
	Temperature	38.9					38.2		36.7
	Pulse	128					140		118
	Respiratory rate	48			38				30
	Systolic BP	90					100		120
Patient 7
	Temperature	38					38.2		37.5
	Pulse	106					112		128
	Respiratory rate	34					40		33
	Systolic BP	100					88		94
Patient 8
	Temperature	38.5					37.3
	Pulse	118					114
	Respiratory rate	24
	Systolic BP	100					100
Patient 9
	Temperature	39.1					38.5		40
	Pulse	90					120		145
	Respiratory rate
	Systolic BP	89					90		90
Patient 10
	Temperature	39.7			39.1				38
	Pulse	120			80				120
	Respiratory rate
	Systolic BP	130			130				130
Patient 11
	Temperature	38.1					40.3
	Pulse	144					148
	Respiratory rate	18					78
	Systolic BP	130					140
Patient 12
	Temperature	37.2			39.4
	Pulse	138			127
	Respiratory rate	48			22
	Systolic BP	95			125	96
Patient 13
	Temperature	42	40			40.3
	Pulse	115	120
	Respiratory rate		40
	Systolic BP	150	125
Patient 14
	Temperature	38.3			37.7		36	36.2	37.7
	Pulse	102			105		78	100	96
	Respiratory rate
	Systolic BP	110			140		110	120	118
Patient 15
	Temperature	39.5					40		39
	Pulse	120					120		144
	Respiratory rate
	Systolic BP	140			160
Patient 16
	Temperature	35.8
	Pulse	100
	Respiratory rate	40
	Systolic BP	140			160
Patient 17
	Temperature	38					37.6	40.4
	Pulse	130					92	155
	Respiratory rate						40
	Systolic BP	80					80
Time between admission, first signs of sepsis, start antibiotic therapy and death
Patient	Hours AB	Hours F	Death
1	6	0	>72
2	24	0	>72
3	12	0	>72
4		24	>72
5		12	2
6	6	0	>72
7	4	0	>72
8	24	0	66
9	2	0	51
10	24	0	>72
11	2	0	>72
12	6	0	24
13	2	0	15
14	2	0	>72
15	48	0	48
16	2	0	>72
17	24	0	48
Hours AB = hours between admission and start of antibiotic therapy
Hours F= hours between admission and first sign of sepsis
death= hours between admission and death
